# Supplementary material for: Establishment of Functional PCR-Based Markers against Bacterial Leaf Blight Disease in Rice Landraces of Yunnan Province of China
Source: MDPI journal article supplement (doi:10.3390/life13102101), 2023-10-23
Supplement: s1 [file s1]

**Table S1.** Distribution of genotypes of 4 bacterial blight resistance genes in rice landraces collected from different regions of Yunnan, China.

| Genotypes | Center |       | Eastern |       | Northwestern |       | Southeastern |       | Southern |       | Southwestern |       | Western |       |
|-----------|--------|-------|---------|-------|--------------|-------|--------------|-------|----------|-------|--------------|-------|---------|-------|
|           | N      | %     | N       | %     | N            | %     | N            | %     | N        | %     | N            | %     | N       | %     |
| GT01      | 9      | 18.8  | 1       | 33.3  | 0            | 0.0   | 2            | 9.1   | 18       | 15.4  | 14           | 12.3  | 17      | 17.7  |
| GT02      | 5      | 10.4  | 0       | 0.0   | 0            | 0.0   | 8            | 36.4  | 34       | 29.1  | 17           | 14.9  | 21      | 21.9  |
| GT03      | 1      | 2.1   | 0       | 0.0   | 0            | 0.0   | 0            | 0.0   | 3        | 2.6   | 0            | 0.0   | 0       | 0.0   |
| GT04      | 3      | 6.3   | 0       | 0.0   | 0            | 0.0   | 1            | 4.5   | 11       | 9.4   | 3            | 2.6   | 9       | 9.4   |
| GT05      | 0      | 0.0   | 0       | 0.0   | 0            | 0.0   | 0            | 0.0   | 1        | 0.9   | 0            | 0.0   | 0       | 0.0   |
| GT06      | 0      | 0.0   | 0       | 0.0   | 0            | 0.0   | 0            | 0.0   | 0        | 0.0   | 1            | 0.9   | 2       | 2.1   |
| GT07      | 7      | 14.6  | 0       | 0.0   | 1            | 25.0  | 1            | 4.5   | 18       | 15.4  | 23           | 20.2  | 12      | 12.5  |
| GT08      | 4      | 8.3   | 0       | 0.0   | 0            | 0.0   | 2            | 9.1   | 12       | 10.3  | 24           | 21.1  | 11      | 11.5  |
| GT09      | 1      | 2.1   | 0       | 0.0   | 0            | 0.0   | 0            | 0.0   | 1        | 0.9   | 0            | 0.0   | 0       | 0.0   |
| GT10      | 0      | 0.0   | 0       | 0.0   | 0            | 0.0   | 0            | 0.0   | 0        | 0.0   | 1            | 0.9   | 0       | 0.0   |
| GT11      | 0      | 0.0   | 0       | 0.0   | 0            | 0.0   | 0            | 0.0   | 2        | 1.7   | 0            | 0.0   | 3       | 3.1   |
| GT12      | 0      | 0.0   | 0       | 0.0   | 0            | 0.0   | 0            | 0.0   | 0        | 0.0   | 1            | 0.9   | 1       | 1.0   |
| GT13      | 11     | 22.9  | 1       | 33.3  | 0            | 0.0   | 2            | 9.1   | 3        | 2.6   | 11           | 9.6   | 8       | 8.3   |
| GT14      | 2      | 4.2   | 0       | 0.0   | 0            | 0.0   | 2            | 9.1   | 2        | 1.7   | 4            | 3.5   | 1       | 1.0   |
| GT15      | 4      | 8.3   | 0       | 0.0   | 0            | 0.0   | 0            | 0.0   | 1        | 0.9   | 2            | 1.8   | 2       | 2.1   |
| GT16      | 1      | 2.1   | 1       | 33.3  | 3            | 75.0  | 2            | 9.1   | 7        | 6.0   | 10           | 8.8   | 5       | 5.2   |
| GT17      | 0      | 0.0   | 0       | 0.0   | 0            | 0.0   | 2            | 9.1   | 1        | 0.9   | 2            | 1.8   | 0       | 0.0   |
| GT18      | 0      | 0.0   | 0       | 0.0   | 0            | 0.0   | 0            | 0.0   | 0        | 0.0   | 1            | 0.9   | 0       | 0.0   |
| GT19      | 0      | 0.0   | 0       | 0.0   | 0            | 0.0   | 0            | 0.0   | 0        | 0.0   | 0            | 0.0   | 1       | 1.0   |
| GT20      | 0      | 0.0   | 0       | 0.0   | 0            | 0.0   | 0            | 0.0   | 0        | 0.0   | 0            | 0.0   | 2       | 2.1   |
| GT21      | 0      | 0.0   | 0       | 0.0   | 0            | 0.0   | 0            | 0.0   | 1        | 0.9   | 0            | 0.0   | 0       | 0.0   |
| GT22      | 0      | 0.0   | 0       | 0.0   | 0            | 0.0   | 0            | 0.0   | 0        | 0.0   | 0            | 0.0   | 1       | 1.0   |
| GT23      | 0      | 0.0   | 0       | 0.0   | 0            | 0.0   | 0            | 0.0   | 1        | 0.9   | 0            | 0.0   | 0       | 0.0   |
| GT24      | 0      | 0.0   | 0       | 0.0   | 0            | 0.0   | 0            | 0.0   | 1        | 0.9   | 0            | 0.0   | 0       | 0.0   |
| Total     | 48     | 100.0 | 3       | 100.0 | 4            | 100.0 | 22           | 100.0 | 117      | 100.0 | 114          | 100.0 | 96      | 100.0 |

Note: N, the number of the landrace with the corresponding *R* gene; %, the percentage of the landrace with *R* gene.
